# Supplementary material for: The health policy response to COVID-19 in Malawi
Source: HighWire-hosted journal article supplement (doi:10.1136/bmjgh-2021-006035), 2021-05-01
Supplement: bmjgh-2021-006035supp001_data_supplement.pdf [file bmjgh-2021-006035supp001_data_supplement.pdf]

**Table of COVID-19 Laboratory Testing Sites in Malawi on 31st August 2020**

| Region          | District                  | Testing Sites                    |                              |
|-----------------|---------------------------|----------------------------------|------------------------------|
| Southern Region | Blantyre                  | Blantyre Dream                   |                              |
|                 |                           | Blantyre Light House             |                              |
|                 |                           | College of Medicine              |                              |
|                 |                           | Malamulo Adventist               |                              |
|                 |                           | Malawi Liverpool Wellcome Trust  |                              |
|                 |                           | Queen Elizabeth Central Hospital |                              |
|                 |                           | Mwanza                           | Mwanza District Hospital     |
|                 |                           | Mangochi                         | Mangochi District Hospital   |
|                 |                           | Zomba                            | Zomba Central Hospital       |
|                 |                           | Balaka                           | Balaka Dream                 |
|                 |                           | Balaka District Hospital         |                              |
|                 | Thyolo                    | Thyolo District Hospital         |                              |
|                 | Neno                      | Neno District Hospital           |                              |
|                 | Phalombe                  | Phalombe District Hospital       |                              |
|                 | Chiradzulu                | Chiradzulu District Hospital     |                              |
|                 | Mulanje                   | Mulanje District Hospital        |                              |
|                 | Chikwawa                  | Chikwawa District Hospital       |                              |
|                 | Nsanje                    | Nsanje District Hospital         |                              |
|                 | Machinga                  | Machinga District Hospital       |                              |
| Central Region  | Lilongwe                  | Bwaila Hospital                  |                              |
|                 |                           | Kamuzu Central Hospital          |                              |
|                 |                           | Kamuzu Barracks                  |                              |
|                 |                           | Lilongwe Light House             |                              |
|                 |                           | Partners in Health               |                              |
|                 |                           | UNC Project Lilongwe             |                              |
|                 |                           | Salima                           | Salima District Hospital     |
|                 |                           | Mchinji                          | Mchinji District Hospital    |
|                 |                           | Dowa                             | Dowa District Hospital       |
|                 |                           | Kasungu                          | Kasungu District Hospital    |
|                 |                           | Nkhotakota                       | Nkhotakota District Hospital |
|                 |                           | Dedza                            | Dedza District Hospital      |
|                 |                           |                                  | Nkhoma Mission               |
|                 |                           | Ntcheu                           | Ntcheu District Hospital     |
| Ntchisi         | Ntchisi District Hospital |                                  |                              |
| Northern Region | Mzimba                    | Mzuzu Central Hospital           |                              |
|                 |                           | Mzimba South District Hospital   |                              |
|                 |                           | Wezi Medical Centre              |                              |
|                 | Nkhata Bay                | Nkhata Bay District Hospital     |                              |
|                 | Karonga                   | Karonga District Hospital        |                              |
|                 |                           | Karonga MEIRU                    |                              |
|                 | Chitipa                   | Chitipa District Hospital        |                              |
|                 | Likoma                    | Likoma                           |                              |
|                 | Rumphi                    | Rumphi District Hospital         |                              |

MEIRU: Malawi Epidemiology and Intervention Research Unit
